# Supplementary material for: Epidemiological and Evolutionary Dynamics of Influenza B Viruses in Malaysia, 2012-2014
Source: PubMed Central journal article supplement (PMC4552379; doi:10.1371/journal.pone.0136254), 2015-08-27
Supplement: pone.0136254.s009.pdf [file pone.0136254.s009.pdf]

**S3 Table. Average nucleotide and amino acid sequence homology.**

| Year      | Victoria Clade 1   |           |                        |           | Yamagata Clade 2   |           |                    |           | Yamagata Clade 3   |           |                  |                  | WHO Vaccine Component (Southern Hemisphere) |                               |
|-----------|--------------------|-----------|------------------------|-----------|--------------------|-----------|--------------------|-----------|--------------------|-----------|------------------|------------------|---------------------------------------------|-------------------------------|
|           | vs                 |           | vs                     |           | vs                 |           | vs                 |           | vs                 |           | Yamagata Lineage | Victoria lineage |                                             |                               |
|           | B/Brisbane/60/2008 |           | B/Massachusetts/2/2012 |           | B/Wisconsin/1/2010 |           | B/Wisconsin/1/2010 |           | B/Wisconsin/1/2010 |           |                  |                  |                                             |                               |
| HA (n=67) |                    | NA (n=68) |                        | HA (n=53) |                    | NA (n=52) |                    | HA (n=71) |                    | NA (n=69) |                  |                  |                                             |                               |
|           | nt                 | aa        | nt                     | aa        | nt                 | aa        | nt                 | aa        | nt                 | aa        | nt               | aa               |                                             |                               |
| 2012      | 99.29%             | 99.51%    | 99.30%                 | 99.26%    | 99.51%             | 99.73%    | 99.50%             | 99.60%    | 99.32%             | 99.29%    | 99.47%           | 99.68%           | -                                           | B/Brisbane/60/2008-like virus |
| 2013      | 99.14%             | 99.52%    | 99.25%                 | 99.01%    | 99.33%             | 99.68%    | 99.45%             | 99.58%    | 99.26%             | 99.33%    | 99.31%           | 99.39%           | B/Wisconsin/1/2010-like virus               | B/Brisbane/60/2008-like virus |
| 2014      | 99.11%             | 99.41%    | 99.23%                 | 98.92%    | 99.21%             | 99.54%    | 99.42%             | 99.50%    | 99.34%             | 99.24%    | 99.03%           | 98.71%           | B/Massachusetts/2/2012-like virus           | B/Brisbane/60/2008-like virus |

n: number of Malaysian influenza B viruses ; nt: nucleotide ; aa: amino acid
